# Supplementary material for: Simultaneous N-doping of reduced graphene oxide and TiO2 in the composite for visible light photodegradation of methylene blue with enhanced performance
Source: Royal Society of Chemistry journal article supplement (doi:10.1039/c3ra43403f), 2013-01-01
Supplement: c3ra43403f.pdf [file c3ra43403f.pdf]

## Supplementary information

### 1. SEM images

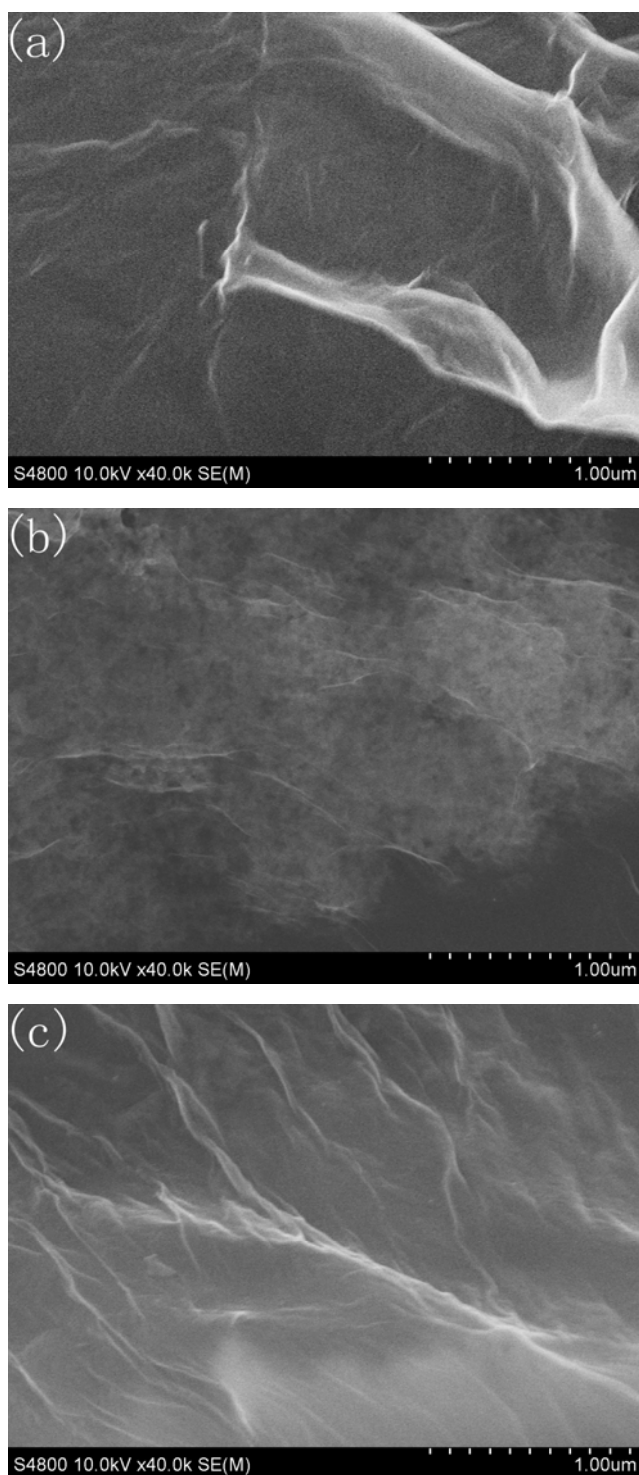

Figure S1. SEM images of GO (a), RGO (b) and N-doped RGO (c).

2. TGA measurements: Thermo-gravimetric analysis (TGA) was conducted using a Perkin Elmer Diamond TG/DTA instrument. Samples (5-10 mg) were heated in air up to 800 °C at a rate of 10 °C/min.

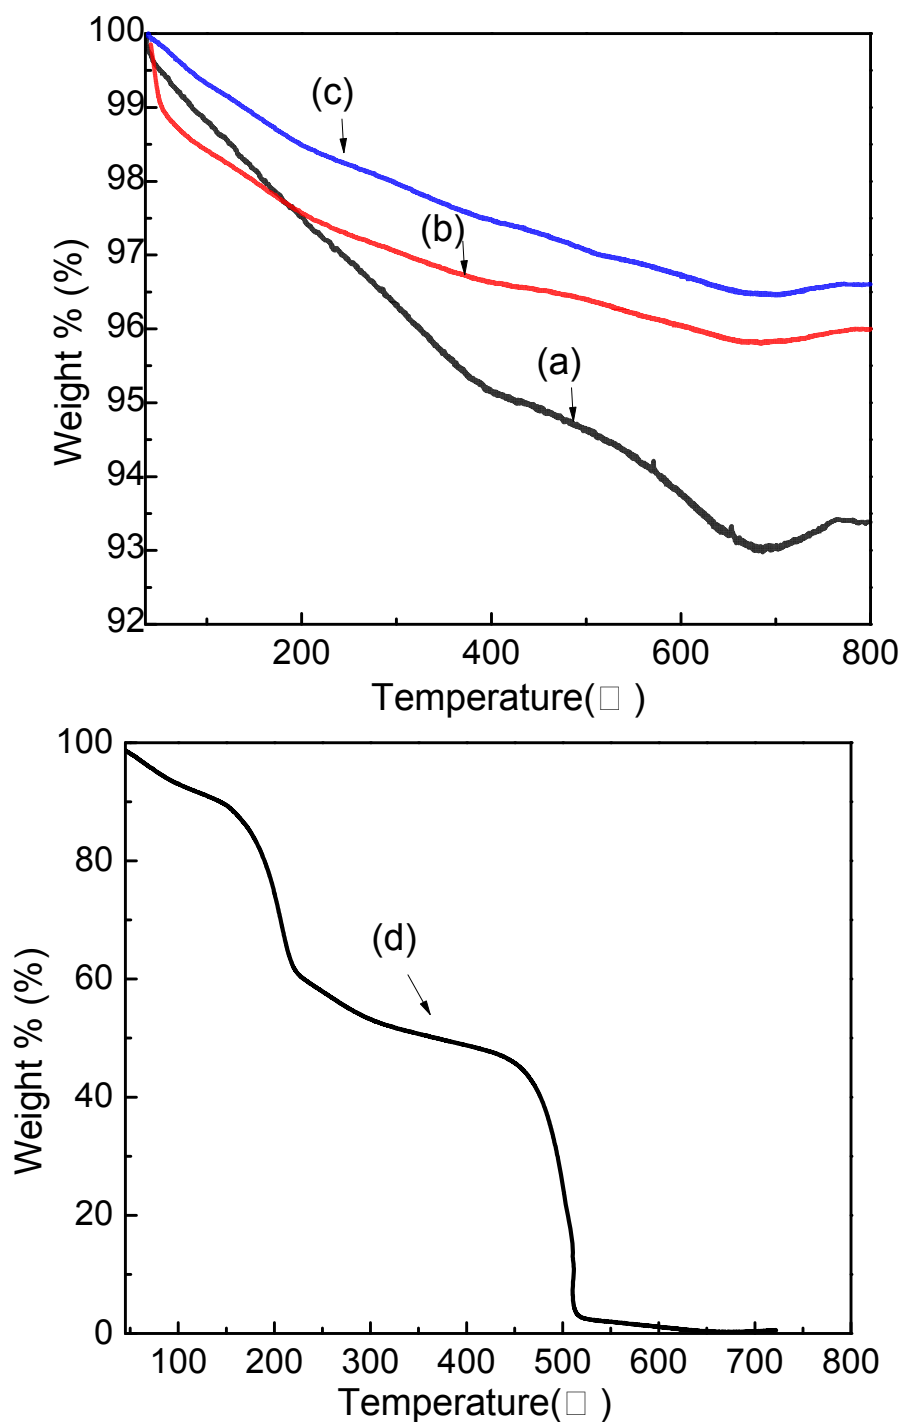

Figure S2. TGA curves of N-P90-600 (a), N-P90/RGO-600 (b), N-P90/N-RGO-600 (c) and RGO-600 (d).

### 3. Comparison of photocatalytic performance

Table S1. Comparison of photocatalytic performance between samples in this work and those reported in the previous study

|               |                     |                             |                              |
|---------------|---------------------|-----------------------------|------------------------------|
| This work     | Photocatalyst       | C/C <sub>0</sub> at 80 min. | C/C <sub>0</sub> at 100 min. |
|               | P90                 | 86%                         | 81%                          |
|               | N-P90/RGO-600       | 46%                         | 43%                          |
|               | N-P90/N-RGO-600     | 43%                         | 34%                          |
| Zhang et al.* | Photocatalyst       | C/C <sub>0</sub> at 70 min. | C/C <sub>0</sub> at 90 min.  |
|               | P25                 | 75%                         | 71%                          |
|               | P25-0.5%GR          | 59%                         | 54%                          |
|               | P25-5%GR (the best) | 41%                         | 34%                          |

\*Yanhui Zhang, Zi-Rong Tang, Xianzhi Fu, and Yi-Jun Xu, *ACS Nano*, **2010**, 4, 7303–7314. Experimental details of photodegradation: In a typical process, a 20 mg portion of catalyst was suspended in 160 mL of 10 ppm MB solution. Before irradiation, the suspensions were stirred in the dark for 4 h to ensure the establishment of adsorption-desorption equilibrium. A 500W Xe arc lamp equipped with a UV cutoff filter ( $\lambda > 400$  nm) was used as light source. A 3 mL sample solution was taken at a certain time interval during the experiment and centrifuged to remove the catalyst completely.
